# Supplementary material for: Removal of cadmium from a citrate-bearing solution by floatable microsized garlic peel
Source: Royal Society of Chemistry journal article supplement (doi:10.1039/c8ra03502d), 2018-01-01

Supporting Information for  
Removal of cadmium from citrate-bearing solution  
by floatable micro-sized garlic peel

Jiangang Sun<sup>a, #</sup>, Lipu Yin<sup>a</sup>, Xiaohui Li<sup>b, \*</sup>, Xianbin Ai<sup>a</sup>, Ying Huang<sup>c</sup>,  
Yanli Yin<sup>c</sup>, Junyou Liu<sup>c</sup>, Kai Huang<sup>a, \*</sup>

<sup>a</sup>School of Metallurgical and Ecological Engineering, University of Science and Technology Beijing, Xueyuan Rd.30, Haidian District, 100083, Beijing city, China

<sup>b</sup>Institute of Bioresource, Jiang Xi province, Changdong Rd. 7777, Nanchang City, China

<sup>c</sup>Beijing Keda Advanced Technology Company, Xueyuan Rd.30, Haidian District, 100083, Beijing city, China

**AUTHOR INFORMATION:**

**Corresponding Author**

\*E-mail: [khuang@metall.ustb.edu.cn](mailto:khuang@metall.ustb.edu.cn). Tel.: +86-10-62334204.

\*E-mail: [lixiaohui211121@163.com](mailto:lixiaohui211121@163.com); Tel.: +86-10-82375042.

**Fig. 1** Pseudo-first-order kinetics plots for adsorption of Cd(II) onto FSGP at 288 K at different initial concentrations of cadmium ions (same adsorption conditions as stated in Fig. 3 of the context)

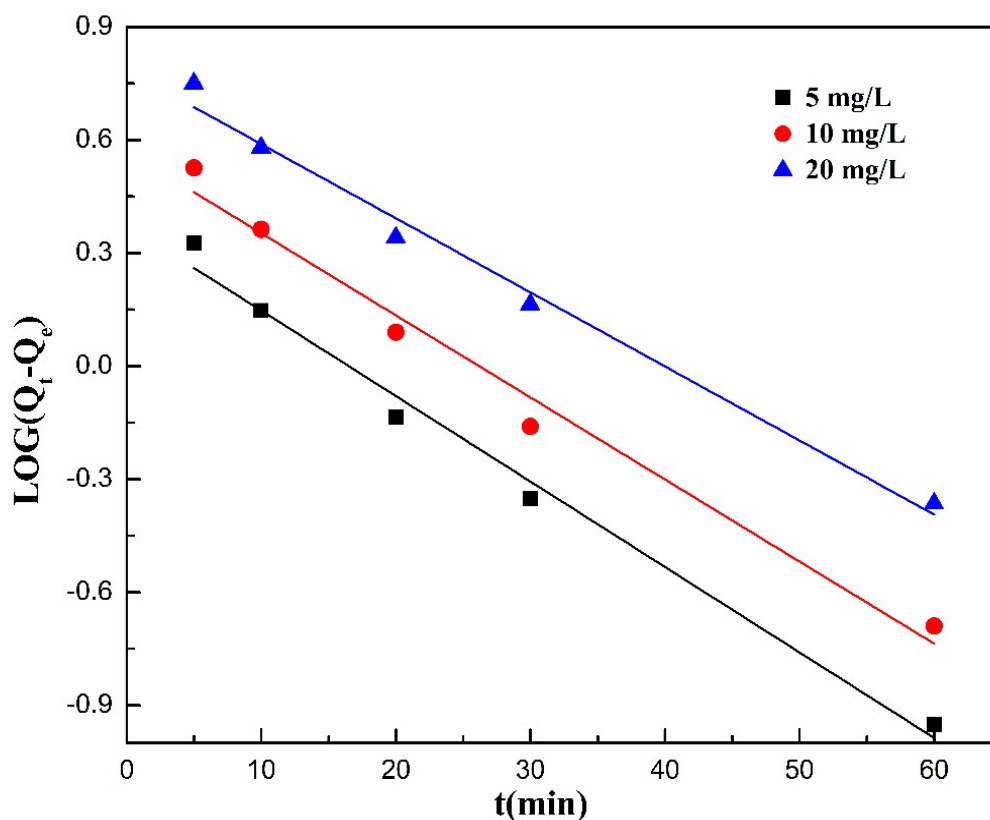

| t (min) | Log (Q <sub>e</sub> -Q <sub>t</sub> ) |        |        |
|---------|---------------------------------------|--------|--------|
|         | 5mg/L                                 | 10mg/L | 20mg/L |
| 5       | 0.33                                  | 0.53   | 0.75   |
| 10      | 0.15                                  | 0.36   | 0.58   |
| 20      | -0.14                                 | 0.09   | 0.34   |
| 30      | -0.35                                 | -0.16  | 0.16   |
| 60      | -0.95                                 | -0.69  | -0.36  |

**Fig. 2** Pseudo-second-order kinetic plots for adsorption of Cd(II) onto FSGP at 288 K

at different initial concentrations of cadmium ions (same adsorption conditions as stated in Fig. 3 of the context)

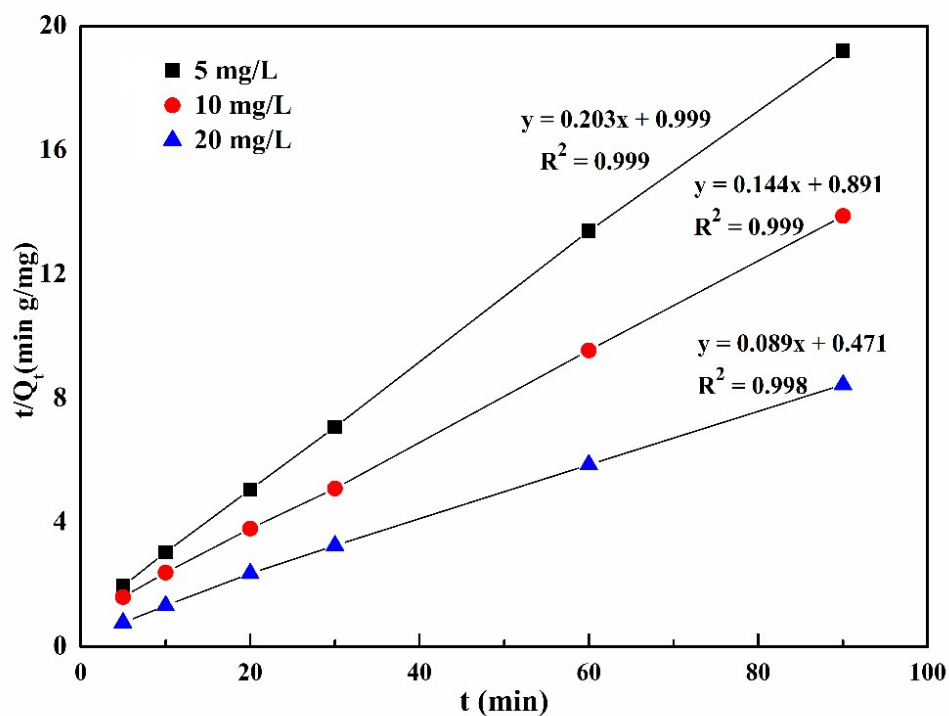

| t (min) | t/Q <sub>t</sub> (min g/mg) |        |        |
|---------|-----------------------------|--------|--------|
|         | 5mg/L                       | 10mg/L | 20mg/L |
| 5       | 1.96                        | 1.60   | 0.78   |
| 10      | 3.05                        | 2.39   | 1.33   |
| 20      | 5.06                        | 3.81   | 2.36   |
| 30      | 7.08                        | 5.10   | 3.26   |
| 60      | 13.41                       | 10.04  | 5.87   |
| 90      | 19.21                       | 13.89  | 8.45   |

**Fig. 3** Pseudo-second-order plots at different temperature (same adsorption

conditions as stated in Fig. 4 of the context)

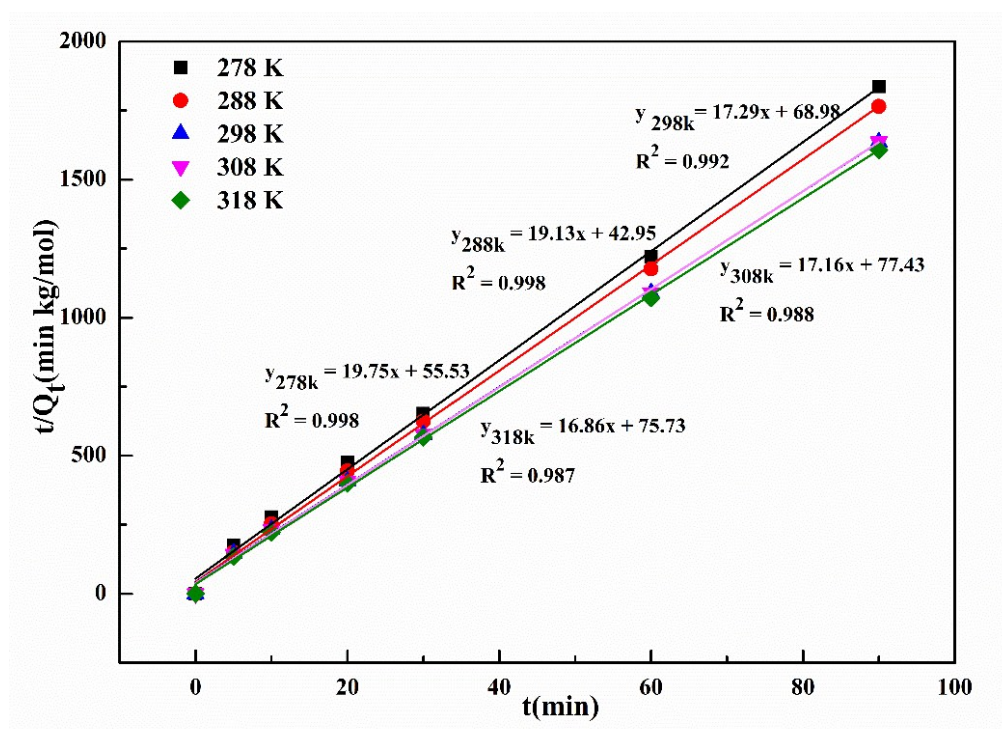

| t (min) | t/Q <sub>t</sub> (min kg/mol) |        |        |        |        |
|---------|-------------------------------|--------|--------|--------|--------|
|         | 278 K                         | 288 K  | 298 K  | 308 K  | 318 K  |
| 5       | 173.5                         | 150.1  | 147.1  | 142.9  | 134.9  |
| 10      | 277.8                         | 253.2  | 232.6  | 232.6  | 222.5  |
| 20      | 476.2                         | 444.5  | 408.2  | 408.2  | 400.1  |
| 30      | 652.2                         | 625.1  | 576.9  | 576.9  | 566.1  |
| 60      | 1219.2                        | 1176.5 | 1090.3 | 1090.3 | 1071.4 |
| 90      | 1836.7                        | 1764.7 | 1636.3 | 1636.4 | 1607.1 |

**Fig.4** Curve obtained by thermodynamic calculation

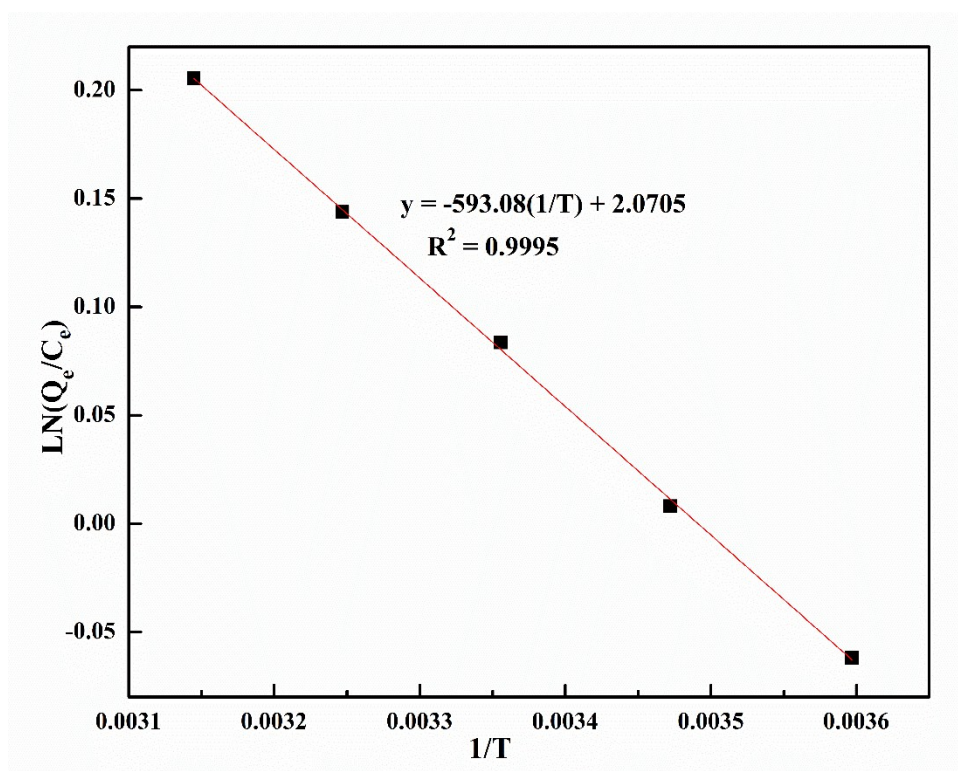

Equations for calculation:

$$\Delta G = -RT \ln K$$

$$\Delta G = \Delta H - T\Delta S$$

$$\ln K = -\frac{\Delta H}{RT} + \frac{\Delta S}{R}$$

$$K = q_e/C_e = \frac{(C_0 - C_e)V}{C_e m}$$

Table 1

| C <sub>0</sub> (mg/L) | ΔH (KJ/mol) | ΔS (J/mol) | ΔG/(KJ/mol) |        |        |        |
|-----------------------|-------------|------------|-------------|--------|--------|--------|
|                       |             |            | 288K        | 298K   | 308K   | 318K   |
| 10                    | 4.93        | 17.21      | -0.026      | -0.199 | -0.371 | -0.543 |

**Fig. 5** Effect of adsorption and elution cycles on the cadmium adsorption on FSGP

particles

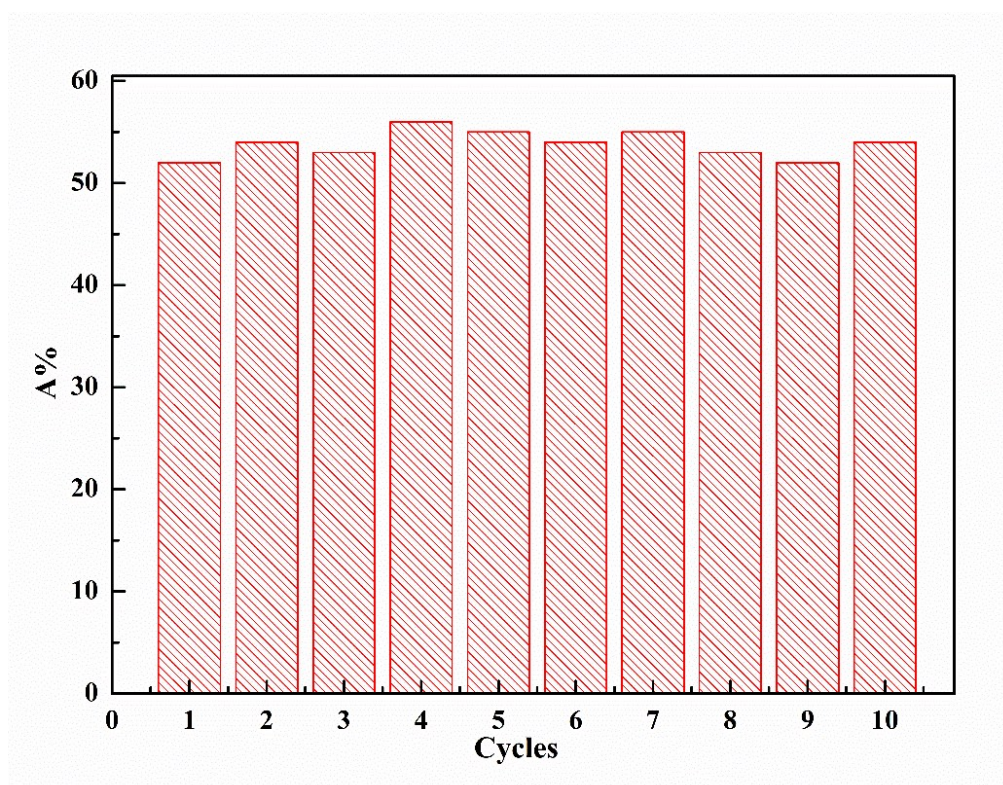

**Fig. 6** XPS of the FSGP particles before and after adsorption of Cd(II) (weight of



adsorbent=300 mg; volume of Cd(II) solution=300 ml; equilibrium pH=5.0;  
adsorption temperature=288K; contact time=60 min, cadmium concentration=20mg/L,  
citrate concentration=0.01 mol/L)

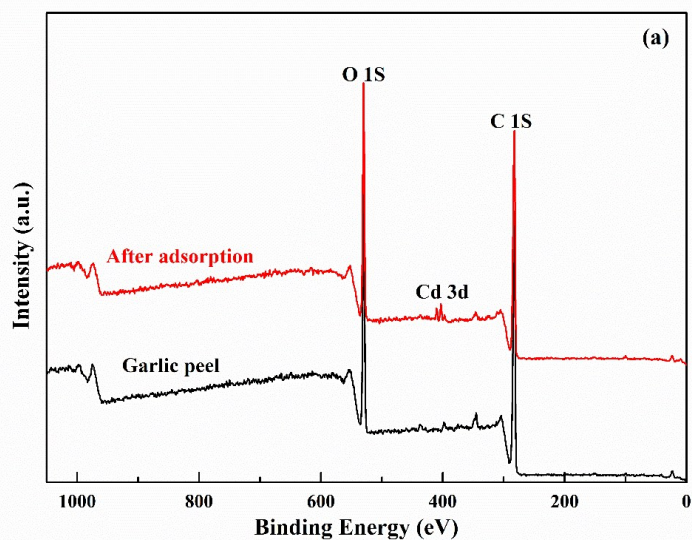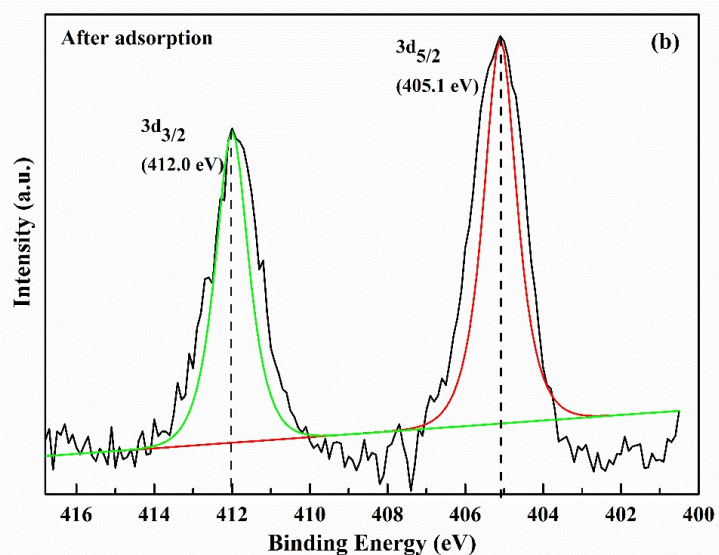

**Fig. 7** Flowsheet of contaminated soil remediation by washing and adsorption process

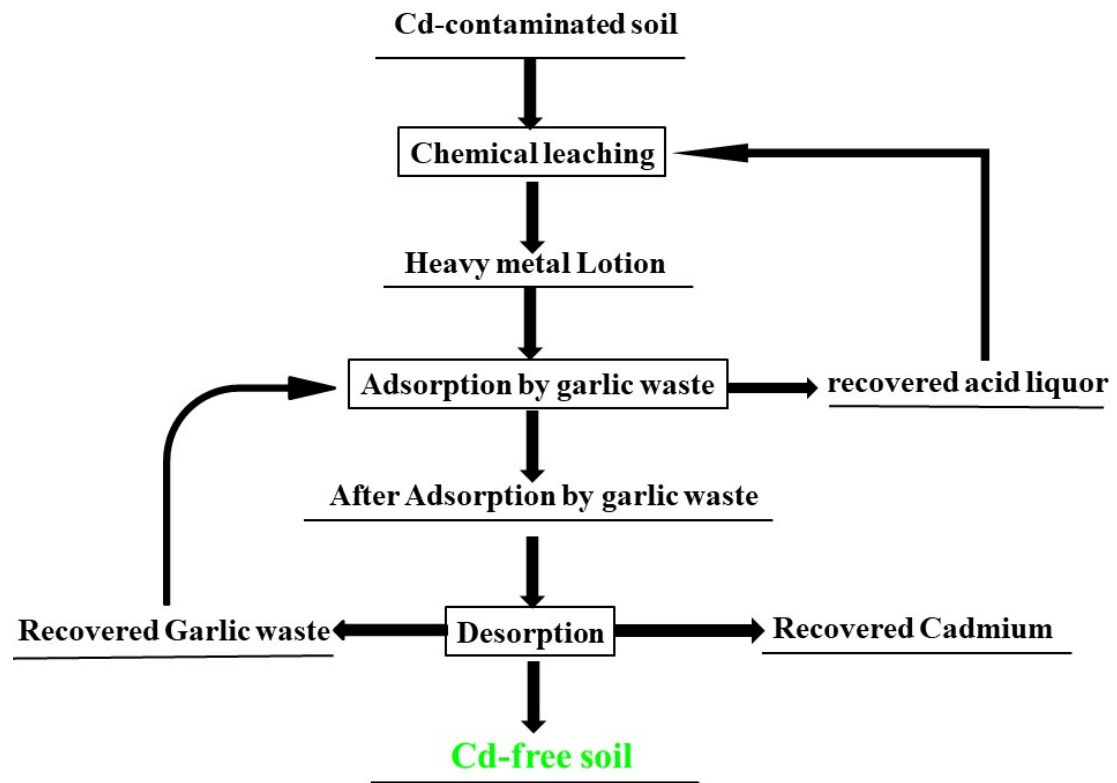

Supplement: c8ra03502d1.pdf [file c8ra03502d1.pdf]
